# Supplementary material for: Combining molecular typing and spatial pattern analysis to identify areas of high tuberculosis transmission in a moderate-incidence county in Taiwan
Source: PubMed Central journal article supplement (PMC5511213; doi:10.1038/s41598-017-05674-6), 2017-07-14

## **Combining molecular typing and spatial pattern analysis to identify areas of high tuberculosis transmission in a moderate-incidence county in Taiwan**

Yih-Yuan Chen<sup>a</sup>, Jia-Ru Chang<sup>b</sup>, Chih-Da Wu<sup>c</sup>, Yen-Po Yeh<sup>f</sup>, Shiu-Ju Yang<sup>b</sup>, Chih-Hao Hsu<sup>b</sup>, Ming-Ching Lin<sup>b</sup>, Ching-Fang Tsai<sup>d</sup>, Ming-Shian Lin<sup>e</sup>, Ih-Jen Su<sup>b</sup> and Horng-Yunn Dou<sup>b#</sup>

<sup>a</sup>Department of Biochemical Science and Technology, National Chiayi University, Chia-Yi, Taiwan

<sup>b</sup>National Institute of Infectious Diseases and Vaccinology, National Health Research Institutes, Zhunan, Miaoli, Taiwan

<sup>c</sup>Department of Forestry and Natural Resources, National Chiayi University, Chia-Yi, Taiwan; The Center for Health and the Global Environment, Harvard T. H. Chan School of Public Health, Boston, MA, USA

<sup>d</sup>Department of Medical Research, Ditmanson Medical Foundation Chia-Yi Christian Hospital, Chia-Yi, Taiwan

<sup>e</sup>Department of Internal Medicine, Ditmanson Medical Foundation Chia-Yi Christian Hospital, Chia-Yi, Taiwan

<sup>f</sup>Chang-Hua County Public Health Bureau, Taiwan

<sup>#</sup>Corresponding author

Horng-Yunn Dou, Ph.D.,

E-mail address: [hydou@nhri.org.tw](mailto:hydou@nhri.org.tw)

Mailing address: National Institute of Infectious Diseases and Vaccinology, National Health Research Institutes, Taiwan

No.35, Keyan Road, Zhunan Town, Miaoli County 350, Taiwan, ROC.

Tel: 886-37-246166 ext 35529 Fax: 886-37-583009

**Key words:** *Mycobacterium tuberculosis*, geographical information system (GIS), Beijing lineage

Running title: Spatial analysis of high TB transmission

## **Figure legends**

**Supplementary Figure 1.** Spatial distribution of TB cases in the study sites. (A) Total TB cases. (B) Random samples of molecularly analyzed TB cases. Esri ArcGIS 10.2 was used to create this figure (<http://www.esri.com/software/arcgis>).

(A)

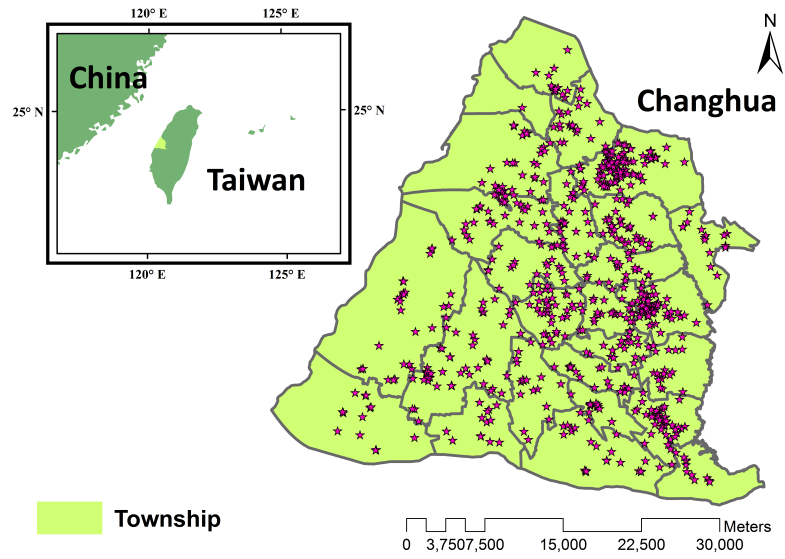

(B)

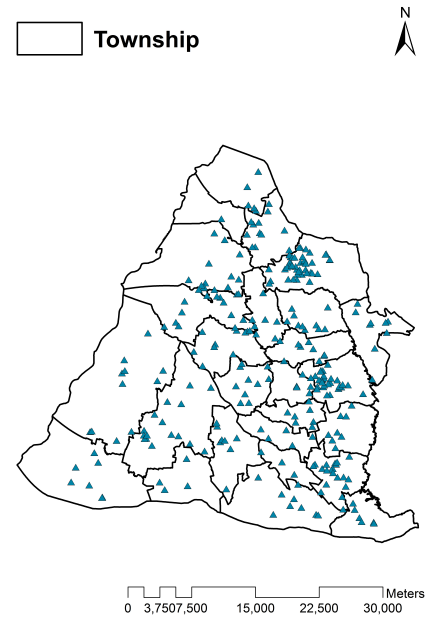

Supplement: 41598_2017_5674_MOESM1_ESM.pdf [file 41598_2017_5674_MOESM1_ESM.pdf]
